# Supplementary material
Source: Research Square preprint supplement (doi:10.21203/rs.3.rs-8855118/v1)
Supplement: Supplementary file 1 [file 29d7c25219f3296ea0e9169e.docx]

**Outreach with a nurse health specialism**

**System Stakeholder Topic Guide**

**(V1.4 18th November 24)**

| **Note on using this topic guide**   - Individual online interviews, recorded in Teams **with camera off.** - This topic guide has been designed to be used flexibly. This means that the question wording, order in which issues are covered and the time spent on different topics will vary between interviews. - Interviewers are free to explore any unanticipated but relevant themes that arise. - This topic guide has been developed for staff who can inform understanding of the intervention and delivery in context. - **Interviewer prompts are denoted in italics. Participants can discuss a topic spontaneously before prompting specific issues.** There is no expectation that all prompts are covered for any one question or in every interview. - The purpose of these interviews is to explore: context, service delivery, perceived barriers and facilitators to delivery. - **Make sure you have the table ready for Section 3 and that the participant has opened the invitation attachment and has it to hand.** - **Be prepared to take notes!** |
| --- |

**Introduction to the study**

1. Interviewer introduction.
2. Quick study summary/overview of interview – we are speaking with a small number of people following an initial group consultation.
3. Check that the participant has sufficient time (around 40 minutes, but may take longer, in which case we will check whether they are happy to continue).
4. Check that participant has read the PIS and that we have a signed consent form (should have been completed/checked by TM and saved to Teams folder prior to interview).
5. Remind them that taking part is entirely voluntary, and that they can choose not to answer specific questions and stop the interview at any time. Encourage candid thoughts, that there are no right or wrong answers.
6. Confidentiality and anonymity in the reporting of findings.
7. Ask the participant if they have any questions.
8. **Check participant is happy for discussion to be audio recorded, turn off cameras and turn on the audio-recorder/start recording in Teams. Take notes as a back-up.**

**Topics**

1. **Background information**

***For background information, I would like to start by asking you a little about your role.***

- Please can you describe your role, including job title and remit?
- How long have you worked in this role? *What is your background? Have you done similar work before?*

***Thinking about outreach with a health specialism…***

- How is it typically delivered? *By whom, with whom? Where? How often?*

1. **Context**

***This intervention will be provided at street-based locations by specialist nurses working with existing outreach teams.***

- Do you think there may be any particular challenges in delivering this service on the streets?
  - ***Let’s start by thinking about challenges for nurses*** *(prompt on physical barriers in the locations, access, safety)*
- What do you think might be the main challenges for nurses in engaging service users in this support? What might help them improve engagement? *(identifying themselves, what to wear, how to introduce the service)*
- Specialist nurses will receive supervision from a lead nurse for the intervention. Do you think they may need any other support? (*What type? Who from?)*
- ***Now, thinking about service users…***
- Do you think there may be particular challenges with some groups? *(prompt on physical barriers in the locations, access, safety)*
- Are there particular groups of people sleeping rough who you think might benefit more than others from the service?
- Do you think that support is likely to be more effective or necessary with certain groups?

***And a few operational questions…***

- From your experience, what might be the best times and days for this service to operate? Why?
- What do you think might be the main safeguarding concerns in providing this service? How can they be best managed?
- Are there any wider challenges that you think nurses may face in delivering this support? *(E.g. policy, legislation, resources, collaboration between services)*

1. **Training**

*We’ve identified the training that specialist nurses will receive for the intervention. I’d like to work through this content with you now and get your views on it, including any thoughts on strengths, limitations, and any gaps.*

**(THIS TABLE CAN BE SHARED ON SCREEN WITH THE INTERVIEWEE FOR DISCUSSION)**

**List the content of each session with the interviewee. Ask them to reflect on what is included – is there anything they think is particularly important to include, anything unnecessary, and anything that might be missing?**

| **Session** | **Session Components** |
| --- | --- |
| Session 1: Chronic diseases | - Complex health needs, including the ‘tri-morbidity’ of mental health, physical health and substance use - Causes of chronic diseases - Self-neglect - Accessing primary care (e.g. GP registration) |
| Session 2: Physical health consequences of addiction | - Physical impacts of alcohol and substance use, including withdrawal - Approaches to harm reduction - Assessing capacity and client safeguarding |
| Session 3: Preventative and public health intervention | - Primary care - Screening services - Contraception - Vaccinations - Annual health checks - Optician, dentist, nutrition and other health promoting services |
| Session 4: Legal literacy | - Housing legal frameworks - Immigration legal frameworks, including No Recourse to Public Funds (NRPF) - Primary and secondary care legal frameworks - Safeguarding legal frameworks - The Care Act (2014) |

1. **Mechanisms**

***We held an initial group consultation on the intervention, with the aim of trying to understand how it might operate. We identified various ways that the intervention might bring about change. I’d like to talk through these now and get your views on them.***

- **‘Fresh’ engagement:** *We felt the intervention was a chance for Outreach Nurses to introduce a ‘fresh’ engagement for Outreach teams, shifting the focus from housing to health.* Does this sound realistic? Do you think there may be any challenges to this?
- **Outreach Nurses’ professional identity:** *Individuals who are on the street may recognise the professional identity of nurses and may trust their knowledge and advice.* What do you think the effect of this would be for service users? What about for outreach teams?
- **Appropriate service referral and engagement:** *Outreach Nurses can provide accurate health assessments and refer to the correct health services.* Do you think there may be any barriers to this part of the intervention? Is there anything that could support this?
- **Clinical and legal advocacy:** *If individuals have significant health care or support needs, they may be seen as a priority for housing. Nurses have expertise and are able to demonstrate why a person is in priority need and vulnerable from a health point of view.* Do you think the specialist nurses can act as service user advocates in this way? What might help them in doing that? What might make that more challenging? *(prompt on local housing capacity, responses from other agencies)*
- **Inter-professional recognition:** *Their professional identity, and associated expertise, may be valued more than the expertise of Outreach workers in getting responses such as Care Act assessments, Mental Health Act assessments etc.* Does this seem feasible? How do you think other health professionals will view this service? Do you think there maybe any challenges of inter-professional working?

1. **Final reflections**

- Do you have any further observations on how the intervention should work, or the challenges that may be faced?

***Thank participants for their contribution to the study***

***Check whether they have any further comments or have any questions***
